1 **Title:** Exposure to heavy metals *in utero* and autism spectrum disorder at age 3: A meta-  
2 analysis of two cohorts with enriched likelihood of autism

3  
4 **Authors:** John F. Dou<sup>1</sup>, Rebecca J. Schmidt<sup>2</sup>, Heather E. Volk<sup>3</sup>, Manon M. Nitta<sup>1</sup>, Jason I.  
5 Feinberg<sup>3</sup>, Craig J. Newschaffer<sup>4</sup>, Lisa A. Croen<sup>5</sup>, Irva Hertz-Picciotto<sup>2</sup>, M. Daniele Fallin<sup>6</sup>, Kelly  
6 M. Bakulski<sup>1</sup>

7  
8 **Affiliations:**

9 <sup>1</sup>University of Michigan, Ann Arbor, Michigan, USA

10 <sup>2</sup>University of California Davis, Davis, California, USA

11 <sup>3</sup>Johns Hopkins University, Baltimore, Maryland, USA

12 <sup>4</sup>Penn State University, State College, PA, USA

13 <sup>5</sup>Division of Research, Kaiser Permanente Northern California, Oakland, CA, USA

14 <sup>6</sup>Rollins School of Public Health, Emory University, Atlanta, GA, USA

15

16

17 **Corresponding author:**

18 Kelly M. Bakulski, email: [bakulski@umich.edu](mailto:bakulski@umich.edu), phone: (734) 615 5899, address: M5511 SPH2,  
19 1415 Washington Heights Ann Arbor, MI 48109

20

21 **Conflicts of Interest:** The authors declare they have no conflicts of interest related to this work  
22 to disclose.

23

24 **Funding Acknowledgements:**

25 Funding for the EARLI study was provided by the National Institutes of Health (R01ES016443,  
26 R24ES030893) and Autism Speaks (003953). Funding for the MARBLES study was provided by  
27 the National Institutes of Health (R01ES020392, R01ES028089, R/U24ES028533, and  
28 P01ES011269) and the United States Environmental Protection Agency Science to Achieve  
29 Results program (#RD-83329201). Funding for metals measures and this work was supported  
30 by the National Institutes of Health (R01ES025531). The content is solely the responsibility of  
31 the authors and does not necessarily represent the official views of the National Institutes of  
32 Health.

33 **Abstract**

34 **Background:** Autism spectrum disorder (ASD) is a prevalent and heterogeneous  
35 neurodevelopmental disorder. Risk is attributed to genetic and prenatal environmental factors,  
36 though the environmental agents are incompletely characterized.

37  
38 **Methods:** In Early Autism Risk Longitudinal Investigation (EARLI) and Markers of Autism Risk  
39 in Babies Learning Early Signs (MARBLES), two pregnancy cohorts with high likelihood of ASD,  
40 maternal urinary metals concentrations at two time points during pregnancy were measured  
41 using inductively coupled plasma mass spectrometry. At age three, clinicians assessed ASD  
42 with DSM-5 criteria. Using multivariable log binomial regression, we examined each metal for  
43 association with ASD status, adjusting for gestational age at urine sampling, child sex, maternal  
44 age, and maternal education, and meta-analyzed across the two cohorts.

45  
46 **Results:** In EARLI (n=170) 17.6% of children were diagnosed with ASD, and an additional  
47 43.5% were classified as having other non-neurotypical development (Non-TD). In MARBLES  
48 (n=156), 22.7% were diagnosed with ASD, while an additional 11.5% had Non-TD. In earlier  
49 pregnancy metals measures, having cadmium concentration over the level of detection was  
50 associated with 1.78 (1.19, 2.67) times higher risk of ASD, and 1.43 (1.06, 1.92) times higher  
51 risk of Non-TD. A doubling of early pregnancy cesium concentration was marginally associated  
52 with 1.81 (0.95, 3.42) times higher risk of ASD, and 1.58 (0.95, 2.63) times higher risk of Non-  
53 TD.

54  
55 **Conclusion:** Exposure *in utero* to elevated levels of cadmium and cesium, as measured in  
56 maternal urine collected during pregnancy, was associated with increased risk of developing  
57 ASD.

58  
59 **Keywords:** Metals exposure, autism spectrum disorder, pregnancy cohort, epidemiology,  
60 cadmium

## 61 **Introduction**

62 Autism Spectrum Disorder (ASD) presents a major public health concern. ASD is a  
63 neurodevelopmental disorder characterized by impairments in social communication, social  
64 interaction, and restrictive and repetitive behavioral patterns and interests (Diagnostic and  
65 statistical manual of mental disorders □: DSM-5. 2013). In the United States, 1 in 36 children are  
66 affected by ASD, with the prevalence among boys 3.8 times greater than among girls (Maenner  
67 et al. 2023). Individuals with ASD and their families face significant social and financial burdens,  
68 with higher costs for individuals with more severe ASD (Rogge and Janssen 2019). The social  
69 cost of ASD was greater than \$7 trillion between the years 1990 – 2019 and is projected to be  
70 an additional \$4 to \$15 trillion by 2029 (Cakir et al. 2020). Increases in ASD prevalence have  
71 been attributed to increasing social awareness (Keyes et al. 2012), changes to diagnostic  
72 criteria (Hansen et al. 2015), and participation in early intervention services (Worley et al. 2011).  
73 However, the full source of this increase is largely unknown, suggesting incidence may be  
74 rising. Environmental exposures may play a role in this increase. Understanding modifiable risk  
75 factors for ASD could play a major role in guiding public health interventions.

76 Metals are a potential modifiable risk factor in ASD. In the United States, women of  
77 childbearing age experience widespread environmental exposure to metals, and higher  
78 concentrations have been observed in pregnant woman compared to non-pregnant women  
79 (Martin and Fry 2018; Watson et al. 2020). Important neurodevelopmental processes occur  
80 during pregnancy (Estes and McAllister 2016), and exposure to environmental factors such as  
81 metals are suggested to have a role in ASD etiology (Bölte et al. 2019; Heyer and Meredith  
82 2017; Lyall et al. 2014). Among children diagnosed with ASD relative to controls, higher blood  
83 levels of arsenic (Ding et al. 2023), mercury (Ding et al. 2023; Jafari et al. 2017; Zhang et al.  
84 2021), lead (Rashaid et al. 2021; Saghazadeh and Rezaei 2017; Zhang et al. 2021), and  
85 cadmium (Baj et al. 2021) have been observed. Although these findings are suggestive,  
86 exposure to metals was measured after ASD diagnosis. In studies where child levels of metals

87 were measured after ASD was diagnosed, it is not known if elevated exposure levels preceded  
88 ASD. Some studies have examined exposure during pregnancy. Poorer performance on social  
89 and behavioral tests among children at age 3 was associated with elevated manganese levels  
90 in infant toenails and arsenic in maternal toenails (Doherty et al. 2020), and prenatal maternal  
91 blood lead levels (Fruh et al. 2019). In contrast, elevated copper levels in maternal urine or  
92 blood during pregnancy was associated with decreased behavior problems assessed in children  
93 aged 3-7 years (Jedynak et al. 2021). Studies examining ASD diagnosis and metals exposure  
94 during pregnancy are less common. One nested case-control study in the Norwegian Mother,  
95 Father, and Child Cohort Study linked with the Norwegian Patient Registry examined maternal  
96 blood metals concentrations during pregnancy, finding elevated arsenic, cadmium, and  
97 manganese were associated with ASD, and lower levels of cesium, copper, mercury, and zinc  
98 were associated with ASD (Skogheim et al. 2021). There is limited study on prenatal metals  
99 exposure and ASD, and more prospective cohorts with exposure measures of multiple metals  
100 are needed.

101 This study was conducted in two pregnancy cohorts with increased likelihood of ASD,  
102 the Early Autism Risk Longitudinal Investigation (EARLI) and the Markers of Autism Risk in  
103 Babies - Learning Early Signs (MARBLES) study. The goal of this study was to examine the  
104 associations between concentrations of a panel of twenty-two metals measured during  
105 pregnancy with ASD diagnosis in children at age 3 years.

106

## 107 **Methods**

### 108 *Study sample*

109 The Early Autism Risk Longitudinal Investigation (EARLI) is a prospective pregnancy  
110 cohort to study autism etiology (Newschaffer et al. 2012). The EARLI study was reviewed and  
111 approved by Human Subjects Institutional Review Boards (IRBs) from each of the four study  
112 sites (Johns Hopkins University, Drexel University, University of California Davis, and Kaiser

113 Permanente Northern California). Markers of Autism Risk Learning Early Signs (MARBLES) is  
114 also an enriched-familial risk prospective pregnancy cohort to study autism etiology (Hertz-  
115 Picciotto et al.). The MARBLES protocol was reviewed and approved by the Human Subjects  
116 IRB from University of California Davis. Secondary data analysis for this manuscript was  
117 approved by the Human Subjects IRB for the University of Michigan. These studies recruited  
118 mothers of children with clinically confirmed ASD (probands) who were early in a subsequent  
119 pregnancy or were trying to become pregnant. In EARLI there were 232 mothers with a  
120 subsequent child (sibling) born during the study between November 2009 and March 2012. In  
121 MARBLES there were 389 enrolled mothers that gave birth to 425 subsequent children (sibling)  
122 between December 1, 2006 and July 1, 2016.

123

#### 124 *Covariate and outcome assessment*

125 Demographics, pregnancy behaviors, and medical history were all collected via maternal  
126 questionnaire at enrollment. For the children born during the study (siblings), at age three years  
127 clinicians assessed them with DSM-5 criteria. Children were categorized into three groups:  
128 typically developing, ASD, or other non-typical development. Outcome categorization, based on  
129 a previously published algorithm using the Autism Diagnostic Observation Schedule (ADOS)  
130 and the Mullen Scales of Early Learning (MSEL) (Ozonoff et al. 2014), has been described in  
131 these cohorts previously (Mordaunt et al. 2019; Philippat et al. 2018). In brief, the typical  
132 development group did not meet diagnostic criteria for ASD. Those that did not meet diagnostic  
133 criteria, but had ADOS scores within three points of the cutoff or MSEL scores 1.5 to 2 standard  
134 deviations below average, were categorized in the non-typical development group. Finally,  
135 those who met diagnostic DSM-5 criteria and ADOS scores over the cutoff were categorized in  
136 the ASD group.

137

#### 138 *Exposure assessment*

139 Maternal urine samples collected at two time points during pregnancy (earliest timepoint  
140 approximately mean 19 weeks of pregnancy, latest timepoint approximately mean 32 weeks  
141 pregnancy) had urinary concentrations of a panel of metals measured using inductively coupled  
142 plasma mass spectrometry by NSF International (Centers for Disease Control and Prevention  
143 method 3018.3, with modifications for the expanded metals panel and the Thermo Scientific  
144 iCAP RQ instrument). Metals measured include antimony, arsenic, barium, beryllium, cadmium,  
145 cesium, chromium, cobalt, copper, lead, manganese, mercury, molybdenum, nickel, platinum,  
146 selenium, thallium, tin, tungsten, uranium, vanadium, and zinc. Samples for both cohorts were  
147 randomized together into two laboratory runs and runs had variable limits of detection (LOD)  
148 (**Supplemental Table 1**). For example, for lead the LOD was either 0.1 ppb (83 samples in  
149 EARLI, 36 samples in MARBLES) or 0.2 ppb (262 samples in EARLI, 369 samples in  
150 MARBLES), depending on batch. To assess urinary dilution, specific gravity was measured by  
151 NSF International using an ATAGO handheld digital refractometer model PAL-10S. After  
152 excluding samples involved in a multiple birth (n=23), related siblings from non-multiple births  
153 (selecting one randomly to keep, n=18 samples dropped), or missing gestational age at  
154 collection (n=3), EARLI had 165 mothers with metals measures from two timepoints, and 15  
155 mothers with a measure from one timepoint. MARBLES had 154 mothers with metals measures  
156 from two timepoints, and 97 mothers with a measure from one timepoint. Distribution of  
157 gestational age at urine sample collection are shown in **Supplemental Figure 1**.

158 As a sensitivity analysis, maternal blood concentrations during pregnancy of cadmium,  
159 manganese, lead, selenium, and total mercury were also measured in EARLI. Maternal venous  
160 blood samples were collected in trace metal free EDTA tubes. Blood samples from the first  
161 study visit (n=215) were used. Metal concentrations in maternal blood samples were measured  
162 by inductively coupled dynamic reaction cell plasma mass spectrometry by the US Centers for  
163 Disease Control and Prevention (ELAN DRC II, PerkinElmer Norwalk, CT) (method DLS 3016.8,

164 Centers for Disease Control and Prevention). Micro-clotting of the archived blood prevented  
165 measures in half of samples, leaving n=104 with measured concentrations.

166 Data used in this manuscript is publicly available through the National Institute of Mental  
167 Health Data Archive (EARLI cohort repository: 1600, MARBLES cohort repository: 1946,  
168 EARLI/MARBLES metals repository: 2462) and through data requests to the Principal  
169 Investigators of cohorts (EARLI: MDF, MARBLES: RJS).

170

### 171 *Statistical analyses*

172 We used R statistical software (version 4.0.2) for statistical analysis. Code to produce  
173 analyses is available (<https://github.com/bakulskilab>). Metals with less than approximately 10%  
174 of samples above the LOD were dropped from analysis (beryllium, platinum, tungsten, uranium,  
175 vanadium). Metals with less than 75% of samples above the LOD (antimony, cadmium,  
176 chromium, lead) were treated as binary variables, based on whether a sample was above or  
177 below the LOD. For the rest of the metals, concentrations were used as continuous variables.  
178 We substituted all urinary metals measures quantitated with values below the LOD with the  
179 value of the LOD/square root of two (Hornung and Reed 1990). Metal concentrations were  
180 adjusted for specific gravity by multiplying concentrations by the ratio of [the median specific  
181 gravity – 1] and [sample specific gravity – 1] (Middleton et al. 2019). We then log<sub>2</sub> transformed  
182 the continuous concentrations. Outlier metals concentrations >5 standard deviations from the  
183 mean were dropped from analyses. The number of samples dropped per metal are listed in

### 184 **Supplemental Table 2.**

185 We separated urinary measures into earlier and later pregnancy timepoints. For those  
186 with two measures, the sample with lowest gestational age at collection was put into the earlier  
187 timepoint sample. For those with only one sample, gestational age at collection  $\geq$  28 weeks  
188 (third trimester) was considered late pregnancy, and otherwise samples were considered earlier

189 pregnancy. We compared exposure levels in early and late pregnancy with Spearman  
190 correlation tests.

191 We calculated univariate descriptive statistics on each cohort using mean and standard  
192 deviation for continuous variables and count and frequency for categorical variables. The  
193 distributions of metal concentrations were described using mean, median, standard deviation,  
194 interquartile range, and the number and percent above the limit of detection. We calculated  
195 Spearman correlation of metals concentrations within each cohort. Separately for each cohort,  
196 we compared the bivariate sample characteristics by neurodevelopmental outcome (ASD, non-  
197 typically developing, typically developing) using ANOVA tests for continuous variables and chi-  
198 square tests for categorical variables.

199 To estimate the adjusted associations between urinary metals concentration in  
200 pregnancy and neurodevelopmental status, we used log binomial models to get estimates of  
201 relative risk. Due to convergence issues, we used the delta-method normal approximations for  
202 fitting models using the epitools package (Muller and MacLehose 2014). We estimated the  
203 association of each metal with ASD status relative to the typically developing group using the  
204  $\log_2$  transformed concentrations, adjusting for gestational age at urine sampling, child sex,  
205 maternal age, and maternal education. We also tested metals associations with non-typically  
206 developing status (typically developing as reference) in separate log binomial models.

207 Models were fit separately for each cohort, then meta analyzed together using the  
208 inverse variance method in the R meta package. We reported risk ratios (RR) and 95%  
209 confidence intervals (95% CI) for each association and visualized the results using forest plots.  
210 For metals that were modeled continuously, since concentrations were log-transformed, the  
211 reported associations are for a doubling in concentration. For metals that were modeled as  
212 binary, we reported the risk ratio for above versus below the limit of detection. To account for  
213 multiple comparisons, we also reported false discovery rate adjusted p-values.



214 We performed several sensitivity analyses to assess the robustness of our findings.  
215 Since runs for metals measures had variable limits of detection, which impacts binary  
216 categorization and imputation for values below limit of detection, we ran models adjusted for  
217 batch. We also performed multivariable logistic regression for each of our models to generate  
218 adjusted odds ratios (OR) that may be compared to the risk ratios and to prior findings in the  
219 literature. Lastly, we performed analyses on the subset of EARLI samples with maternal blood  
220 metals measures available and compared the findings to the findings in urinary metals.

221

## 222 **Results**

### 223 *Sample descriptive statistics*

224 At the earliest pregnancy timepoint, urinary metal concentrations were above the limit of  
225 detection in greater than 75% of the samples for 13 metals in each cohort (arsenic, barium,  
226 cesium, cobalt, copper, manganese, mercury, molybdenum, nickel, selenium, thallium, tin, and  
227 zinc) (**Supplemental Table 3**). In both EARLI and MARBLES, cobalt (Co) and nickel (Ni)  
228 concentrations had the strongest correlation (Spearman  $r=0.57$  in EARLI,  $r=0.59$  in MARBLES)  
229 (**Figure 1**).

230 In the earlier pregnancy timepoint there were metals concentrations available from 170  
231 urine samples in EARLI (66 typically developing, 74 non-typically developing, 30 ASD) and 158  
232 in MARBLES (104 typically developing, 18 non-typically developing, 36 ASD) (**Table 1**). In  
233 EARLI, maternal education and child sex assigned at birth were associated with child  
234 neurodevelopmental status. The typically developing group had higher levels of maternal  
235 education (71.2% with college degree), compared to the non-typically developing (54.1%) and  
236 ASD groups (43.3%). The typically developing and non-typically developing groups had a  
237 similar proportion of males (42.4% and 47.3%) but lower proportion than the ASD group  
238 (76.7%). In MARBLES, compared to the typically developing group (51.9% male), both the non-

239 typically developing group (66.7% male) and ASD (75.0% male) had higher proportion of males  
240 (**Table 1**).

241 At the later pregnancy timepoint, urinary metal concentrations were above the limit of  
242 detection in slightly less than 75% of the sample for manganese, mercury, and tin  
243 (**Supplemental Table 4**), however they were modelled as continuous for comparability with the  
244 early timepoint results. In late pregnancy, cobalt and nickel remained the strongest correlated  
245 metals in MARBLES (Spearman  $r=0.74$ ), but not in EARLI. In both cohorts, lead and copper  
246 ( $r=0.43$  in EARLI,  $r=0.49$  in MARBLES) as well as lead and manganese ( $r=0.45$  in both) were  
247 correlated (**Supplemental Figure 2**).

248 At the later pregnancy timepoint, there were 171 samples with urinary metal  
249 concentrations available in EARLI (65 typically developing, 75 non-typically developing, 31  
250 ASD) and 231 in MARBLES (146 typically developing, 34 non-typically developing, 51 ASD)  
251 (**Supplemental Table 5**). For mothers with two timepoints, correlation between the two were  
252 strongest for measured cadmium ( $r=0.48$  in EARLI,  $r=0.42$  in MARBLES), cesium ( $r=0.42$  in  
253 both cohorts), mercury ( $r=0.48$  in EARLI,  $r=0.63$  in MARBLES), tin ( $r=0.57$  in EARLI,  $r=0.59$  in  
254 MARBLES), and zinc ( $r=0.53$  in EARLI,  $r=0.47$  in MARBLES). Cross timepoint correlation was  
255 weakest for antimony ( $r=0.29$  in EARLI,  $r=0.15$  in MARBLES) and manganese ( $r=0.21$  in EARLI,  
256  $r=0.12$  in MARBLES) (**Supplemental Table 6**).

257

### 258 *Urinary Metal Association with Autism Spectrum Disorder Status*

259 We examined associations between urinary metals in the earlier pregnancy timepoint  
260 and ASD. In meta-analysis, comparing ASD to typical development, having urine cadmium  
261 concentration above the limit of detection was associated with  $RR=1.78$  (95% CI 1.19, 2.67)  
262 times higher risk for ASD (EARLI  $RR=1.92$ , 95% CI 1.05, 3.51; MARBLES  $RR=1.68$ , 95% CI  
263 0.97, 2.89). (**Figure 2, Table 2**). A doubling in arsenic was associated with lower ASD risk  
264 ( $RR=0.85$ , 95% CI 0.76, 0.94), driven by the EARLI cohort (EARLI  $RR=0.82$ , 95% CI 0.73, 0.92;

265 MARBLES RR=1.01, 95% CI 0.78, 1.31). Marginal associations were observed with cesium,  
266 where a doubling in urinary concentration was estimated to have RR=1.81 (95% CI 0.95, 3.42).  
267 Thallium concentration doubling was marginally associated with RR=1.16 (95% CI 1.08, 1.26),  
268 with stronger effect in MARBLES (RR=1.15, 95% CI 1.10, 1.32) than in EARLI (RR=1.00, 95%  
269 CI 0.68, 1.48). The associations for cadmium (FDR=0.085) and arsenic (FDR=0.051) reached  
270 FDR < 0.1 when adjusting for multiple comparisons. No associations were observed between  
271 the remaining urinary metal concentrations and ASD status at this early pregnancy time point.

272 At the later pregnancy timepoint, we estimated the association between each metal  
273 concentration and ASD. Comparing ASD to typically developing in meta-analyses, a doubling in  
274 cesium was associated with RR=1.71 (95% CI 1.01, 2.9) in meta-analysis (EARLI RR=2.10,  
275 95% CI 0.85, 5.22.; MARBLES RR=1.55, 95% CI 0.81, 2.95) (**Figure 2, Table 2**). A doubling in  
276 thallium was associated with ASD with RR=1.16 (95% CI 1.10,1.23), though effects were  
277 different between cohorts (EARLI RR=0.84, 95% CI 0.52, 1.37.; MARBLES RR=1.17, 95% CI  
278 1.10, 1.24). A doubling in tin was associated with RR=1.12 (95% CI 1.01,1.24). A doubling in  
279 mercury was marginally associated with RR=1.09 (95% CI 1.00, 1.20), with differences between  
280 EARLI (RR=1.14, 95% CI 1.03, 1.26) and MARBLES (RR=0.91, 95% CI 0.73, 1.13). The  
281 association with thallium reached FDR < 0.1. No associations were observed between the  
282 remaining urinary metal concentrations and ASD status at this later pregnancy time point.

283

#### 284 *Urinary Metal Association with Non-Typically Developing Status*

285 We repeated the adjusted regression analyses estimating the association of earlier  
286 pregnancy urinary metals and non-typically developing status. Urine cadmium concentrations  
287 above the LOD was associated with elevated risk of non-typical development, with RR=1.43  
288 (95% CI 1.06, 1.92). (**Figure 3, Table 3**). A doubling of cesium urinary concentration was  
289 marginally associated with RR=1.58 (95% CI 0.95, 2.63) times higher risk of non-typical  
290 development. A marginal relationship with molybdenum was also observed, where a doubling in

291 concentration was related to RR=1.47 (95% CI 0.95, 2.28). A doubling of nickel was associated  
292 with RR=1.40 (95% CI 1.01, 1.94), driven by the EARLI cohort with RR=1.55 (95% CI 1.08,  
293 2.23). No associations were observed between the remaining urinary metal concentrations and  
294 non-typically developing status at this early pregnancy time point.

295 We examined associations between non-typically developing and the later pregnancy  
296 metals measures. Though not statistically significant, having urine cadmium concentration  
297 above the limit of detection was associated with RR=1.24 (95% CI 0.95, 1.63) times higher risk  
298 of non-typically developing status in meta-analysis (**Supplemental Figure 3, Table 3**). A  
299 doubling of the essential metal selenium concentration was associated in meta-analysis with  
300 RR=0.85 (95% CI 0.82, 0.88) times lower risk of non-typically developing status, driven by  
301 precision of results in MARBLES and had opposite directions of effect by cohort (EARLI  
302 RR=1.31, 95% CI 0.64, 2.69; MARBLES RR=0.85, 95% CI 0.82, 0.88). A doubling of the  
303 essential metal zinc concentration was associated with RR=0.97 (95% CI 0.95, 0.98) lower risk  
304 of non-typically developing status. The zinc and selenium associations reached FDR < 0.1. No  
305 associations were observed between the remaining urinary metal concentrations and non-  
306 typically developing status at this late pregnancy time point.

307

### 308 *Maternal Blood Metal Association with Neurodevelopmental Status*

309 In EARLI, 92 maternal blood samples collected during pregnancy had available  
310 covariate and blood metals measures (41 typically developing, 32 non-typically developing, 19  
311 ASD) (**Supplemental Table 7**). A doubling in maternal blood cadmium was marginally  
312 associated with RR=1.11 (95% CI 0.96, 1.29) higher risk of ASD, and a doubling in maternal  
313 blood lead was associated with RR=1.23 (95% CI 1.01, 1.54) higher risk of ASD (**Supplemental**  
314 **Figure 3**). A doubling in cadmium was also associated with RR=1.10 (95% CI 1.02, 1.19) higher  
315 risk of non-typical development. A doubling in maternal blood lead was associated with  
316 RR=1.16 (95% CI 1.00, 1.35) higher risk of non-typical development (**Supplemental Figure 2**).

317 No associations were observed between the remaining blood metal concentrations (mercury,  
318 selenium, manganese) and neurodevelopmental status.

319

### 320 *Sensitivity Analysis*

321 With batch as a covariate (**Supplemental Tables 8 and 9**), the cadmium association in  
322 early pregnancy with ASD remained consistent where being over the limit of detection was  
323 associated with RR=1.78 (95% CI 1.19, 2.65) times higher risk of ASD. The cadmium  
324 associations with non-typical development also remained consistent. With batch adjustment,  
325 antimony in earlier pregnancy was associated with ASD, with RR=1.58 (95% CI 1.01, 2.48). The  
326 associations between cesium and ASD as well as non-typical development remained consistent  
327 with slight attenuation, as did associations between earlier pregnancy molybdenum and nickel  
328 with non-typical development. On the other hand, the relationships with thallium and ASD were  
329 attenuated.

330 Using logistic regression models, consistency to the previous log binomial findings was  
331 observed for cadmium and cesium. In general, estimates on the odds ratio scale were higher in  
332 magnitude and significance for cadmium and cesium. Strength of relationships between arsenic,  
333 mercury, thallium, and tin with ASD were attenuated with larger confidence intervals when using  
334 logistic regression (**Supplemental Table 10**). Earlier pregnancy molybdenum and nickel  
335 associations with non-typical development remained consistent in logistic regression, while  
336 selenium and zinc associations with non-typical development were attenuated (**Supplemental**  
337 **Table 11**). In logistic regression, earlier pregnancy lead had stronger association with non-  
338 typical development, where lead over the LOD was marginally associated with OR=1.68 (95%  
339 CI 0.92, 3.07).

340

### 341 **Discussion**

342           In these two enriched-likelihood prospective birth cohorts, we measured maternal urinary  
343 metals levels during two timepoints in pregnancy and examined relationships to ASD or non-  
344 typical development status at age 3 in offspring. To our knowledge, this is the first study to  
345 report associations between maternal prenatal urine heavy metal concentrations and ASD  
346 diagnosis in children at 3 years of age in enriched-likelihood prospective cohorts. Our most  
347 consistent finding was heightened risk of atypical neurodevelopment related to cadmium  
348 exposure. Although the relationships were not significant in late pregnancy, the directions of  
349 effect were consistent across time periods. Furthermore, similar findings were observed in the  
350 maternal blood subsample. Cesium related to atypical neurodevelopment was also notable, with  
351 consistency across ASD and non-typical development outcomes and timepoints, with exception  
352 of later pregnancy cesium and non-typical development. Cadmium and cesium associations  
353 were also the most robust to different modelling strategies. This study suggests metals  
354 exposure during pregnancy may be related to risk of ASD or non-typical development status at  
355 age 3.

356           Existing studies have examined the relationship between heavy metals exposure and  
357 ASD with considerable heterogeneity in exposure timing and matrices measured (Campbell et  
358 al. 2021). A systematic review and meta-analysis of lead concentrations in children with ASD  
359 from cross-sectional and case-control studies showed significant difference in blood lead levels  
360 compared to controls, but not in urinary lead levels (Nakhaee et al. 2023). This mirrors our  
361 results in maternal measures during pregnancy, where we found maternal blood lead levels  
362 were associated with risk of ASD or non-typical development in offspring, but not maternal  
363 urinary lead levels. The study in the Norwegian Mother, Father, and Child Cohort Study found  
364 higher odds of ASD for children in the highest quartile of cadmium exposure measured in  
365 maternal blood during pregnancy (Skogheim et al. 2021), matching results from the present  
366 study. The same study found the highest quartile of maternal blood cesium levels had lower  
367 odds of ASD compared to the lowest quartile, while in contrast our study suggests higher risk of

368 ASD with higher maternal urinary cesium. Our results for selenium were mixed, doubling of late  
369 pregnancy selenium concentration was associated with lower risk of non-typical development,  
370 however there were opposite effect estimates between cohorts. Selenium supplementation in an  
371 animal model attenuated autism phenotype (Wu et al. 2022a), and studies measuring selenium  
372 cross-sectionally in children in Saudi Arabia (El-Ansary et al. 2017) and China (Wu et al. 2022b)  
373 found lower selenium levels in those with ASD. On the other hand, two-sample Mendelian  
374 randomization analysis using genetic instruments of blood and blood-toenail selenium suggest  
375 selenium levels are associated with increased risk of ASD (Guo et al. 2023), and in the Boston  
376 Birth Cohort maternal red blood cell selenium levels measured at near delivery were associated  
377 with increased odds of ASD in children (Lee et al. 2021). Considerable heterogeneity in  
378 direction of association between selenium and ASD exist in our study and in the literature, along  
379 with heterogeneity in timing and tissue of measurements. Our findings add to a growing body of  
380 evidence of the neurodevelopmental impacts of metals exposure during pregnancy.

381 This study has several strengths. We were able to assay a wide array of metals with  
382 high detection rates in two different birth cohorts, at two different timepoints. In one cohort, we  
383 were also able to evaluate five metals in a different exposure matrix: maternal blood during  
384 pregnancy. The longitudinal design allowed examination of exposure measures during  
385 pregnancy that preceded subsequent ASD outcome 36 months after birth. The enriched risk  
386 cohort design ensured all participants were clinically assessed using gold standards for ASD  
387 diagnosis.

388 This study modeled metals as linear or dichotomous, but some metals may have non-  
389 linear relationships. While the enriched likelihood cohort design allowed for an extensively  
390 phenotyped sample, our findings may not be generalizable to populations without increased  
391 propensity for ASD, thus it would be important to also compare to results found in population-  
392 based samples. Future studies should also consider other exposure matrices or timepoints. The  
393 choice of exposure matrix is also important for exposure timing. For example, blood cadmium

394 levels reflect recent exposure, while urinary cadmium reflects a longer, cumulative exposure  
395 (Agency for Toxic Substances and Disease Registry (ATSDR) 2012). Certain exposure matrices  
396 may be more reliable for some metals. For example, blood lead is a more reliable measure of  
397 recent exposure compared to urinary or hair lead levels (Agency for Toxic Substances and  
398 Disease Registry (ATSDR) 2020), which may explain our findings of stronger blood lead ASD  
399 associations than those seen with urinary lead.

400 This study suggests that prenatal exposure to metals, such as cadmium, impacts risk of  
401 ASD or non-typical development in offspring. Public health measures to reduce exposure to  
402 heavy metals during pregnancy may be an important preventative strategy for  
403 neurodevelopmental disorders, though larger longitudinal studies are needed.

404



405 **References**

406

407 Agency for Toxic Substances and Disease Registry (ATSDR). 2012. Toxicological profile for  
408 Cadmium.

409 Agency for Toxic Substances and Disease Registry (ATSDR). 2020. Toxicological profile for  
410 Lead.

411 Baj J, Flieger W, Flieger M, Forma A, Sitarz E, Skórzyńska-Dziduszko K, et al. 2021. Autism  
412 spectrum disorder: Trace elements imbalances and the pathogenesis and severity of  
413 autistic symptoms. *Neuroscience and Biobehavioral Reviews* 129:117–132;  
414 doi:10.1016/j.neubiorev.2021.07.029.

415 Bölte S, Girdler S, Marschik PB. 2019. The contribution of environmental exposure to the  
416 etiology of autism spectrum disorder. *Cellular and Molecular Life Sciences* 76:1275–  
417 1297; doi:10.1007/s00018-018-2988-4.

418 Cakir J, Frye RE, Walker SJ. 2020. The lifetime social cost of autism: 1990–2029. *Research in*  
419 *Autism Spectrum Disorders* 72:1–18; doi:10.1016/j.rasd.2019.101502.

420 Campbell KA, Hickman R, Fallin MD, Bakulski KM. 2021. Prenatal exposure to metals and  
421 autism spectrum disorder: Current status and future directions. *Current Opinion in*  
422 *Toxicology* 26:39–48; doi:10.1016/j.cotox.2021.04.001.

423 Diagnostic and statistical manual of mental disorders□: DSM-5. 2013.5th ed. American  
424 Psychiatric Association:Arlington, VA.

425 Ding M, Shi S, Qie S, Li J, Xi X. 2023. Association between heavy metals exposure (cadmium,  
426 lead, arsenic, mercury) and child autistic disorder: a systematic review and meta-  
427 analysis. *Front Pediatr* 11:1169733; doi:10.3389/fped.2023.1169733.

428 Doherty BT, Romano ME, Gui J, Punshon T, Jackson BP, Karagas MR, et al. 2020.  
429 Periconceptual and prenatal exposure to metal mixtures in relation to behavioral  
430 development at 3 years of age. *Environmental Epidemiology* 4;  
431 doi:10.1097/EE9.000000000000106.

432 El-Ansary A, Bjørklund G, Tinkov AA, Skalny AV, Al Dera H. 2017. Relationship between  
433 selenium, lead, and mercury in red blood cells of Saudi autistic children. *Metab Brain Dis*  
434 32:1073–1080; doi:10.1007/s11011-017-9996-1.

435 Estes ML, McAllister AK. 2016. Maternal immune activation: Implications for neuropsychiatric  
436 disorders. *Science* 353:772–777; doi:10.1126/science.aag3194.

437 Fruh V, Rifas-Shiman SL, Amarasiwardena C, Cardenas A, Bellinger DC, Wise LA, et al. 2019.  
438 Prenatal lead exposure and childhood executive function and behavioral difficulties in  
439 project viva. *NeuroToxicology* 75:105–115; doi:10.1016/j.neuro.2019.09.006.

440 Guo X, Tang P, Hou C, Li R. 2023. Mendelian randomization investigation highlights different  
441 roles of selenium status in mental disorders. *Prog Neuropsychopharmacol Biol*  
442 *Psychiatry* 122:110694; doi:10.1016/j.pnpbp.2022.110694.

- 443 Hansen SN, Schendel DE, Parner ET. 2015. Explaining the increase in the prevalence of autism  
444 spectrum disorders: The proportion attributable to changes in reporting practices. *JAMA*  
445 *Pediatrics* 169:56–62; doi:10.1001/jamapediatrics.2014.1893.
- 446 Hertz -Picciotto Irva, Schmidt RJ, Walker CK, Bennett DH, Oliver M, Shedd -Wise Kristine M., et  
447 al. A Prospective Study of Environmental Exposures and Early Biomarkers in Autism  
448 Spectrum Disorder: Design, Protocols, and Preliminary Data from the MARBLES Study.  
449 *Environmental Health Perspectives* 126:117004; doi:10.1289/EHP535.
- 450 Heyer DB, Meredith RM. 2017. Environmental toxicology: Sensitive periods of development and  
451 neurodevelopmental disorders. *NeuroToxicology* 58:23–41;  
452 doi:10.1016/j.neuro.2016.10.017.
- 453 Hornung RW, Reed LD. 1990. Estimation of Average Concentration in the Presence of  
454 Nondetectable Values. *Applied Occupational and Environmental Hygiene* 5:46–51;  
455 doi:10.1080/1047322X.1990.10389587.
- 456 Jafari T, Rostampour N, Fallah AA, Hesami A. 2017. The association between mercury levels  
457 and autism spectrum disorders: A systematic review and meta-analysis. *Journal of Trace*  
458 *Elements in Medicine and Biology* 44:289–297; doi:10.1016/j.jtemb.2017.09.002.
- 459 Jedynak P, Maitre L, Guxens M, Gützkow KB, Julvez J, López-Vicente M, et al. 2021. Prenatal  
460 exposure to a wide range of environmental chemicals and child behaviour between 3  
461 and 7 years of age – An exposome-based approach in 5 European cohorts. *Science of*  
462 *the Total Environment* 763; doi:10.1016/j.scitotenv.2020.144115.
- 463 Keyes KM, Susser E, Cheslack-postava K, Fountain C, Liu K, Bearman PS. 2012. Cohort  
464 effects explain the increase in autism diagnosis among children born from 1992 to 2003  
465 in california. *International Journal of Epidemiology* 41:495–503; doi:10.1093/ije/dyr193.
- 466 Lee ASE, Ji Y, Raghavan R, Wang G, Hong X, Pearson C, et al. 2021. Maternal prenatal  
467 selenium levels and child risk of neurodevelopmental disorders: A prospective birth  
468 cohort study. *Autism Res* 14:2533–2543; doi:10.1002/aur.2617.
- 469 Lyall K, Schmidt RJ, Hertz-Picciotto I. 2014. Maternal lifestyle and environmental risk factors for  
470 autism spectrum disorders. *International Journal of Epidemiology* 43:443–464;  
471 doi:10.1093/ije/dyt282.
- 472 Maenner MJ, Warren Z, Williams AR, Amoakohene E, Bakian AV, Bilder DA, et al. 2023.  
473 Prevalence and Characteristics of Autism Spectrum Disorder Among Children Aged 8  
474 Years - Autism and Developmental Disabilities Monitoring Network, 11 Sites, United  
475 States, 2020. *MMWR Surveill Summ* 72:1–14; doi:10.15585/mmwr.ss7202a1.
- 476 Martin EM, Fry RC. 2018. Environmental Influences on the Epigenome: Exposure- Associated  
477 DNA Methylation in Human Populations. *Annual Review of Public Health* 39:309–333;  
478 doi:10.1146/annurev-publhealth-040617-014629.
- 479 Middleton DRS, Watts MJ, Polya DA. 2019. A comparative assessment of dilution correction  
480 methods for spot urinary analyte concentrations in a UK population exposed to arsenic in  
481 drinking water. *Environment International* 130:104721; doi:10.1016/j.envint.2019.03.069.

- 482 Mordaunt CE, Park BY, Bakulski KM, Feinberg JI, Croen LA, Ladd-Acosta C, et al. 2019. A  
483 meta-analysis of two high-risk prospective cohort studies reveals autism-specific  
484 transcriptional changes to chromatin, autoimmune, and environmental response genes  
485 in umbilical cord blood. *Mol Autism* 10:36; doi:10.1186/s13229-019-0287-z.
- 486 Muller CJ, MacLehose RF. 2014. Estimating predicted probabilities from logistic regression:  
487 different methods correspond to different target populations. *International Journal of*  
488 *Epidemiology* 43:962–970; doi:10.1093/ije/dyu029.
- 489 Nakhaee S, Amirabadizadeh A, Farnia V, Ali Azadi N, Mansouri B, Radmehr F. 2023.  
490 Association Between Biological Lead Concentrations and Autism Spectrum Disorder  
491 (ASD) in Children: a Systematic Review and Meta-Analysis. *Biol Trace Elem Res*  
492 201:1567–1581; doi:10.1007/s12011-022-03265-9.
- 493 Newschaffer CJ, Croen LA, Fallin MD, Hertz-Picciotto I, Nguyen DV, Lee NL, et al. 2012. Infant  
494 siblings and the investigation of autism risk factors. *Journal of Neurodevelopmental*  
495 *Disorders* 4:7; doi:10.1186/1866-1955-4-7.
- 496 Ozonoff S, Young GS, Belding A, Hill M, Hill A, Hutman T, et al. 2014. The Broader Autism  
497 Phenotype in Infancy: When Does It Emerge? *J Am Acad Child Adolesc Psychiatry*  
498 53:398-407.e2; doi:10.1016/j.jaac.2013.12.020.
- 499 Philippat C, Barkoski J, Tancredi DJ, Elms B, Barr D, Ozonoff S, et al. 2018. Prenatal exposure  
500 to organophosphate pesticides and risk of autism spectrum disorders and other non-  
501 typical development at 3 years in a high-risk cohort. *Int J Hyg Environ Health* 221:548–  
502 555; doi:10.1016/j.ijheh.2018.02.004.
- 503 Rashaid AHB, Nusair SD, Alqhazo MT, Adams JB, Abu-Dalo MA, Bashtawi MA. 2021. Heavy  
504 metals and trace elements in scalp hair samples of children with severe autism spectrum  
505 disorder: A case-control study on Jordanian children. *Journal of Trace Elements in*  
506 *Medicine and Biology* 67; doi:10.1016/j.jtemb.2021.126790.
- 507 Rogge N, Janssen J. 2019. The Economic Costs of Autism Spectrum Disorder: A Literature  
508 Review. *Journal of Autism and Developmental Disorders* 49:2873–2900;  
509 doi:10.1007/s10803-019-04014-z.
- 510 Saghazadeh A, Rezaei N. 2017. Systematic review and meta-analysis links autism and toxic  
511 metals and highlights the impact of country development status: Higher blood and  
512 erythrocyte levels for mercury and lead, and higher hair antimony, cadmium, lead, and  
513 mercury. *Progress in Neuro-Psychopharmacology and Biological Psychiatry* 79:340–  
514 368; doi:10.1016/j.pnpbp.2017.07.011.
- 515 Skogheim TS, Weyde KVF, Engel SM, Aase H, Surén P, Øie MG, et al. 2021. Metal and  
516 essential element concentrations during pregnancy and associations with autism  
517 spectrum disorder and attention-deficit/hyperactivity disorder in children. *Environment*  
518 *International* 152; doi:10.1016/j.envint.2021.106468.
- 519 Watson CV, Lewin M, Ragin-Wilson A, Jones R, Jarrett JM, Wallon K, et al. 2020.  
520 Characterization of trace elements exposure in pregnant women in the United States,  
521 NHANES 1999–2016. *Environmental Research* 183; doi:10.1016/j.envres.2020.109208.

- 522 Worley JA, Matson JL, Sipes M, Kozlowski AM. 2011. Prevalence of autism spectrum disorders  
523 in toddlers receiving early intervention services. *Research in Autism Spectrum Disorders*  
524 5:920–925; doi:10.1016/j.rasd.2010.10.007.
- 525 Wu H, Zhao G, Liu S, Zhang Q, Wang P, Cao Y, et al. 2022a. Supplementation with selenium  
526 attenuates autism-like behaviors and improves oxidative stress, inflammation and  
527 related gene expression in an autism disease model. *J Nutr Biochem* 107:109034;  
528 doi:10.1016/j.jnutbio.2022.109034.
- 529 Wu J, Wang D, Yan L, Jia M, Zhang J, Han S, et al. 2022b. Associations of essential element  
530 serum concentrations with autism spectrum disorder. *Environ Sci Pollut Res Int*  
531 29:88962–88971; doi:10.1007/s11356-022-21978-1.
- 532 Zhang J, Li X, Shen L, Ullah N, Zhang X, Chen L, et al. 2021. *Journal of Trace Elements in*  
533 *Medicine and Biology* Trace elements in children with autism spectrum disorder□: A  
534 meta-analysis based on case-control studies. 67.
- 535  
536

**Table 1.** Maternal and child characteristics of participants in the primary analytic sample with measures of metal exposure in urine from early pregnancy. Data are split by cohort and compared by neurodevelopmental status of the sibling. Distributions of categorical variables are compared with a chi-square test and continuous variables are compared with ANOVA test.

| <b>EARLI cohort</b>                     | <b>Typically developing<br/>N=66</b>  | <b>Non-typically developing<br/>N=74</b> | <b>Autism spectrum disorder<br/>N=30</b> | <b>P-value</b> |
|-----------------------------------------|---------------------------------------|------------------------------------------|------------------------------------------|----------------|
| Maternal Education                      |                                       |                                          |                                          | 0.020          |
| College Degree                          | 47 (71.2%)                            | 40 (54.1%)                               | 13 (43.3%)                               |                |
| No Degree                               | 19 (28.8%)                            | 34 (45.9%)                               | 17 (56.7%)                               |                |
| Maternal Age                            | 35.1 (4.68)                           | 33.3 (4.52)                              | 33.8 (3.87)                              | 0.057          |
| Infant Sex                              |                                       |                                          |                                          | 0.006          |
| F                                       | 38 (57.6%)                            | 39 (52.7%)                               | 7 (23.3%)                                |                |
| M                                       | 28 (42.4%)                            | 35 (47.3%)                               | 23 (76.7%)                               |                |
| Weeks of Gestation at Sample Collection | 19.1 (5.14)                           | 18.3 (6.44)                              | 19.4 (7.76)                              | 0.607          |
| Infant Gestational Age at Birth         | 39.5 (1.40)                           | 39.5 (1.36)                              | 38.9 (2.00)                              | 0.094          |
| <b>MARBLES cohort</b>                   | <b>Typically developing<br/>N=104</b> | <b>Non-typically developing<br/>N=18</b> | <b>Autism spectrum disorder<br/>N=36</b> | <b>P-value</b> |
| Maternal Education                      |                                       |                                          |                                          | 0.259          |
| College Degree                          | 62 (59.6%)                            | 9 (50.0%)                                | 16 (44.4%)                               |                |
| No Degree                               | 42 (40.4%)                            | 9 (50.0%)                                | 20 (55.6%)                               |                |
| Maternal Age                            | 34.6 (4.73)                           | 33.8 (4.71)                              | 34.6 (5.01)                              | 0.822          |
| Infant Sex                              |                                       |                                          |                                          | 0.041          |
| Female                                  | 50 (48.1%)                            | 6 (33.3%)                                | 9 (25.0%)                                |                |
| Male                                    | 54 (51.9%)                            | 12 (66.7%)                               | 27 (75.0%)                               |                |
| Weeks of Gestation at Sample Collection | 19.3 (3.99)                           | 18.7 (3.99)                              | 19.0 (3.98)                              | 0.803          |
| Infant Gestational Age at Birth         | 38.9 (1.39)                           | 38.9 (1.54)                              | 39.3 (1.04)                              | 0.296          |

*Acronyms: Early Autism Risk Longitudinal Investigation (EARLI), Markers of Autism Risk in Babies-Learning Early Signs (MARBLES)*

**Table 2.** Adjusted risk ratios for the associations between maternal urinary metal concentrations measured during pregnancy and risk of autism spectrum disorder, relative to typically developing. Log binomial models were adjusted for gestational age, child sex, maternal age, and maternal education. Four metals were modeled categorically (above versus below the limit of detection) and the remaining metals were log<sub>2</sub> transformed and modeled continuously.

| Metal                        | Time    | EARLI |             |        | MARBLE5 |             |        | Meta-Analysis |             |        |        |
|------------------------------|---------|-------|-------------|--------|---------|-------------|--------|---------------|-------------|--------|--------|
|                              |         | RR    | CI          | P      | RR      | CI          | P      | RR            | CI          | P      | FDR    |
| <b>Modeled categorically</b> |         |       |             |        |         |             |        |               |             |        |        |
| Antimony                     | Early   | 1.10  | (0.59,2.07) | 0.76   | 1.25    | (0.63,2.46) | 0.52   | 1.17          | (0.74,1.85) | 0.51   | 0.67   |
|                              | Late    | 1.08  | (0.59,1.97) | 0.81   | 1.21    | (0.66,2.20) | 0.54   | 1.14          | (0.75,1.75) | 0.54   | 0.88   |
| Cadmium                      | Early** | 1.92  | (1.05,3.51) | 0.034  | 1.68    | (0.97,2.89) | 0.062  | 1.78          | (1.19,2.67) | 0.005  | 0.085  |
|                              | Late    | 1.55  | (0.91,2.64) | 0.11   | 0.97    | (0.56,1.68) | 0.90   | 1.23          | (0.84,1.81) | 0.28   | 0.79   |
| Chromium                     | Early   | 1.34  | (0.76,2.39) | 0.31   | 1.35    | (0.71,2.56) | 0.37   | 1.34          | (0.88,2.06) | 0.18   | 0.45   |
|                              | Late    | 1.43  | (0.81,2.51) | 0.22   | 0.92    | (0.42,2.03) | 0.84   | 1.23          | (0.78,1.95) | 0.38   | 0.88   |
| Lead                         | Early   | 1.73  | (0.90,3.33) | 0.10   | 1.09    | (0.61,1.93) | 0.78   | 1.33          | (0.86,2.05) | 0.20   | 0.45   |
|                              | Late    | 1.64  | (0.87,3.08) | 0.13   | 1.08    | (0.67,1.73) | 0.75   | 1.25          | (0.86,1.83) | 0.24   | 0.74   |
| <b>Modeled continuously</b>  |         |       |             |        |         |             |        |               |             |        |        |
| Arsenic                      | Early** | 0.82  | (0.73,0.92) | <0.001 | 1.01    | (0.78,1.31) | 0.93   | 0.85          | (0.76,0.94) | 0.0015 | 0.051  |
|                              | Late    | 1.15  | (0.91,1.46) | 0.24   | 1.10    | (0.89,1.36) | 0.39   | 1.12          | (0.96,1.32) | 0.15   | 0.60   |
| Barium                       | Early   | 1.19  | (0.91,1.56) | 0.20   | 1.07    | (0.84,1.36) | 0.58   | 1.12          | (0.94,1.34) | 0.20   | 0.45   |
|                              | Late    | 0.98  | (0.81,1.19) | 0.85   | 0.99    | (0.83,1.16) | 0.86   | 0.98          | (0.87,1.11) | 0.80   | 0.92   |
| Cesium                       | Early*  | 2.37  | (0.80,7.04) | 0.12   | 1.56    | (0.71,3.44) | 0.27   | 1.81          | (0.95,3.42) | 0.069  | 0.35   |
|                              | Late**  | 2.10  | (0.85,5.22) | 0.11   | 1.55    | (0.81,2.95) | 0.19   | 1.71          | (1.01,2.9)  | 0.045  | 0.31   |
| Cobalt                       | Early   | 0.83  | (0.51,1.34) | 0.43   | 0.74    | (0.42,1.29) | 0.28   | 0.79          | (0.55,1.13) | 0.20   | 0.45   |
|                              | Late    | 0.96  | (0.67,1.36) | 0.81   | 1.00    | (0.73,1.36) | 0.99   | 0.98          | (0.78,1.24) | 0.87   | 0.92   |
| Copper                       | Early   | 1.37  | (0.61,3.08) | 0.45   | 1.09    | (0.64,1.85) | 0.76   | 1.17          | (0.75,1.82) | 0.50   | 0.67   |
|                              | Late    | 3.55  | (1.23,10.3) | 0.02   | 0.93    | (0.72,1.19) | 0.55   | 0.99          | (0.78,1.27) | 0.96   | 0.96   |
| Manganese                    | Early   | 0.95  | (0.67,1.35) | 0.79   | 1.05    | (0.80,1.38) | 0.71   | 1.01          | (0.82,1.26) | 0.90   | 0.96   |
|                              | Late    | 0.94  | (0.70,1.25) | 0.66   | 1.00    | (0.79,1.28) | 0.97   | 0.98          | (0.81,1.17) | 0.79   | 0.92   |
| Mercury                      | Early   | 1.14  | (1.01,1.29) | 0.039  | 0.82    | (0.60,1.11) | 0.19   | 1.09          | (0.97,1.22) | 0.16   | 0.45   |
|                              | Late*   | 1.14  | (1.03,1.26) | 0.013  | 0.91    | (0.73,1.13) | 0.40   | 1.09          | (1.00,1.20) | 0.061  | 0.35   |
| Molybdenum                   | Early   | 1.46  | (0.73,2.91) | 0.29   | 0.97    | (0.68,1.38) | 0.88   | 1.06          | (0.77,1.45) | 0.73   | 0.85   |
|                              | Late    | 0.93  | (0.79,1.10) | 0.43   | 1.08    | (0.78,1.49) | 0.64   | 0.96          | (0.83,1.12) | 0.62   | 0.88   |
| Nickel                       | Early   | 1.05  | (0.72,1.53) | 0.8    | 1.04    | (0.57,1.88) | 0.90   | 1.05          | (0.76,1.44) | 0.78   | 0.86   |
|                              | Late    | 1.07  | (0.72,1.60) | 0.73   | 1.01    | (0.70,1.44) | 0.96   | 1.04          | (0.79,1.35) | 0.79   | 0.92   |
| Selenium                     | Early   | 0.95  | (0.65,1.40) | 0.8    | 0.91    | (0.75,1.10) | 0.33   | 0.92          | (0.77,1.09) | 0.32   | 0.55   |
|                              | Late    | 2.13  | (0.69,6.55) | 0.19   | 0.92    | (0.72,1.18) | 0.52   | 0.96          | (0.75,1.22) | 0.73   | 0.92   |
| Thallium                     | Early*  | 1     | (0.68,1.48) | 0.98   | 1.15    | (1.01,1.32) | 0.038  | 1.14          | (1.00,1.29) | 0.05   | 0.34   |
|                              | Late**  | 0.84  | (0.52,1.37) | 0.5    | 1.17    | (1.10,1.24) | <0.001 | 1.16          | (1.10,1.23) | <0.001 | <0.001 |
| Tin                          | Early   | 1.17  | (1,1.36)    | 0.043  | 0.98    | (0.77,1.24) | 0.85   | 1.11          | (0.98,1.26) | 0.11   | 0.42   |

| Metal | Time   | EARLI |             |       | MARBLES |             |      | Meta-Analysis |             |       |      |
|-------|--------|-------|-------------|-------|---------|-------------|------|---------------|-------------|-------|------|
|       |        | RR    | CI          | P     | RR      | CI          | P    | RR            | CI          | P     | FDR  |
|       | Late** | 1.18  | (1.04,1.33) | 0.01  | 1.01    | (0.84,1.22) | 0.89 | 1.12          | (1.01,1.24) | 0.027 | 0.23 |
| Zinc  | Early  | 1.93  | (1.01,3.70) | 0.048 | 0.95    | (0.82,1.09) | 0.45 | 0.98          | (0.85,1.13) | 0.75  | 0.85 |
|       | Late   | 1.51  | (0.75,3.01) | 0.25  | 1.09    | (0.81,1.48) | 0.56 | 1.15          | (0.87,1.52) | 0.32  | 0.84 |

Symbols: \*\* meta-analysis p-value < 0.05. \* meta-analysis p-value < 0.1.

**Table 3.** Adjusted risk ratios for the associations between maternal urinary metal concentrations measured during pregnancy and risk of non-typically developing, relative to typically developing. Log binomial models were adjusted for gestational age, child sex, maternal age, and maternal education. Four metals were modeled categorically (above versus below the limit of detection) and the remaining metals were log<sub>2</sub> transformed and modeled continuously.

| Metal                        | Time    | EARLI |             |       | MARBLIS |             |        | Meta-Analysis |             |        |        |
|------------------------------|---------|-------|-------------|-------|---------|-------------|--------|---------------|-------------|--------|--------|
|                              |         | RR    | CI          | P     | RR      | CI          | P      | RR            | CI          | P      | FDR    |
| <b>Modeled categorically</b> |         |       |             |       |         |             |        |               |             |        |        |
| Antimony                     | Early   | 1.18  | (0.85,1.64) | 0.32  | 0.70    | (0.18,2.81) | 0.62   | 1.15          | (0.84,1.58) | 0.39   | 0.55   |
|                              | Late    | 0.96  | (0.67,1.38) | 0.84  | 1.68    | (0.85,3.35) | 0.14   | 1.09          | (0.79,1.50) | 0.61   | 0.88   |
| Cadmium                      | Early** | 1.28  | (0.94,1.76) | 0.12  | 3.12    | (1.34,7.3)  | 0.008  | 1.43          | (1.06,1.92) | 0.018  | 0.20   |
|                              | Late    | 1.10  | (0.81,1.49) | 0.55  | 2.02    | (1.1,3.71)  | 0.023  | 1.24          | (0.95,1.63) | 0.12   | 0.58   |
| Chromium                     | Early   | 0.97  | (0.68,1.37) | 0.86  | 1.47    | (0.54,3.99) | 0.45   | 1.01          | (0.73,1.41) | 0.93   | 0.96   |
|                              | Late    | 1.01  | (0.67,1.51) | 0.97  | 1.50    | (0.70,3.21) | 0.29   | 1.1           | (0.77,1.58) | 0.60   | 0.88   |
| Lead                         | Early   | 1.11  | (0.80,1.55) | 0.53  | 2.50    | (1.04,6.00) | 0.041  | 1.23          | (0.9,1.67)  | 0.19   | 0.45   |
|                              | Late    | 0.87  | (0.64,1.18) | 0.36  | 1.09    | (0.59,2.00) | 0.79   | 0.91          | (0.69,1.19) | 0.49   | 0.88   |
| <b>Modeled continuously</b>  |         |       |             |       |         |             |        |               |             |        |        |
| Arsenic                      | Early   | 1.10  | (0.95,1.28) | 0.19  | 0.87    | (0.60,1.27) | 0.48   | 1.07          | (0.93,1.23) | 0.33   | 0.55   |
|                              | Late    | 1.08  | (0.93,1.25) | 0.34  | 0.81    | (0.68,0.97) | 0.025  | 0.96          | (0.86,1.08) | 0.49   | 0.88   |
| Barium                       | Early   | 1.00  | (0.88,1.13) | 0.99  | 1.04    | (0.7,1.53)  | 0.85   | 1.00          | (0.89,1.13) | 0.96   | 0.96   |
|                              | Late    | 0.97  | (0.87,1.07) | 0.53  | 0.96    | (0.77,1.2)  | 0.74   | 0.97          | (0.88,1.06) | 0.48   | 0.88   |
| Cesium                       | Early*  | 1.63  | (0.90,2.96) | 0.11  | 1.44    | (0.53,3.87) | 0.47   | 1.58          | (0.95,2.63) | 0.079  | 0.35   |
|                              | Late    | 1.07  | (0.82,1.39) | 0.63  | 1.06    | (0.55,2.03) | 0.86   | 1.07          | (0.84,1.36) | 0.61   | 0.88   |
| Cobalt                       | Early   | 1.09  | (0.91,1.30) | 0.34  | 1.06    | (0.51,2.19) | 0.88   | 1.09          | (0.92,1.29) | 0.33   | 0.55   |
|                              | Late    | 0.9   | (0.72,1.12) | 0.33  | 0.77    | (0.50,1.18) | 0.23   | 0.87          | (0.71,1.06) | 0.16   | 0.60   |
| Copper                       | Early   | 1.19  | (0.74,1.91) | 0.47  | 1.33    | (0.54,3.28) | 0.53   | 1.22          | (0.80,1.85) | 0.35   | 0.55   |
|                              | Late    | 1.01  | (0.78,1.29) | 0.97  | 0.87    | (0.65,1.17) | 0.35   | 0.95          | (0.78,1.14) | 0.57   | 0.88   |
| Manganese                    | Early   | 0.88  | (0.69,1.13) | 0.32  | 1.01    | (0.64,1.58) | 0.98   | 0.91          | (0.73,1.13) | 0.39   | 0.55   |
|                              | Late    | 0.92  | (0.77,1.11) | 0.39  | 1.05    | (0.79,1.40) | 0.74   | 0.96          | (0.82,1.11) | 0.58   | 0.88   |
| Mercury                      | Early   | 1.04  | (0.95,1.14) | 0.40  | 0.76    | (0.49,1.19) | 0.23   | 1.03          | (0.94,1.12) | 0.57   | 0.72   |
|                              | Late    | 1.03  | (0.93,1.14) | 0.54  | 0.83    | (0.61,1.12) | 0.22   | 1.01          | (0.92,1.11) | 0.84   | 0.92   |
| Molybdenum                   | Early*  | 1.54  | (0.91,2.59) | 0.10  | 1.32    | (0.59,2.95) | 0.49   | 1.47          | (0.95,2.28) | 0.083  | 0.35   |
|                              | Late    | 1.04  | (0.82,1.33) | 0.72  | 0.93    | (0.71,1.22) | 0.62   | 0.99          | (0.83,1.19) | 0.95   | 0.96   |
| Nickel                       | Early** | 1.55  | (1.08,2.23) | 0.018 | 0.92    | (0.44,1.93) | 0.82   | 1.40          | (1.01,1.94) | 0.043  | 0.34   |
|                              | Late    | 1.23  | (0.91,1.66) | 0.19  | 0.74    | (0.59,0.94) | 0.012  | 0.89          | (0.74,1.07) | 0.23   | 0.74   |
| Selenium                     | Early   | 1.38  | (0.76,2.51) | 0.29  | 1.13    | (0.53,2.43) | 0.75   | 1.28          | (0.80,2.05) | 0.30   | 0.55   |
|                              | Late**  | 1.31  | (0.64,2.69) | 0.46  | 0.85    | (0.82,0.88) | <0.001 | 0.85          | (0.82,0.88) | <0.001 | <0.001 |
| Thallium                     | Early   | 0.71  | (0.41,1.23) | 0.22  | 0.96    | (0.56,1.66) | 0.89   | 0.83          | (0.56,1.22) | 0.34   | 0.55   |
|                              | Late    | 1.01  | (0.87,1.19) | 0.87  | 1.02    | (0.71,1.47) | 0.92   | 1.01          | (0.88,1.17) | 0.85   | 0.92   |
| Tin                          | Early   | 1.05  | (0.96,1.16) | 0.27  | 0.83    | (0.54,1.3)  | 0.42   | 1.04          | (0.95,1.14) | 0.36   | 0.55   |



| Metal | Time   | EARLI |             |        | MARBLES |             |      | Meta-Analysis |             |        |        |
|-------|--------|-------|-------------|--------|---------|-------------|------|---------------|-------------|--------|--------|
|       |        | RR    | CI          | P      | RR      | CI          | P    | RR            | CI          | P      | FDR    |
| Zinc  | Late   | 1.03  | (0.94,1.13) | 0.52   | 0.84    | (0.63,1.13) | 0.26 | 1.01          | (0.93,1.11) | 0.78   | 0.92   |
|       | Early  | 0.98  | (0.88,1.09) | 0.73   | 0.96    | (0.67,1.36) | 0.80 | 0.98          | (0.88,1.08) | 0.69   | 0.84   |
|       | Late** | 0.97  | (0.95,0.98) | <0.001 | 0.92    | (0.82,1.03) | 0.14 | 0.97          | (0.95,0.98) | <0.001 | <0.001 |

Symbols: \*\* meta-analysis p-value < 0.05. \* meta-analysis p-value < 0.1.

It is made available under a [CC-BY-NC-ND 4.0 International license](https://creativecommons.org/licenses/by-nc-nd/4.0/).

**Figure 1.** Spearman correlations of urinary metals concentrations, measured during early pregnancy, stratified by cohort. The upper right triangle shows the EARLI cohort. The lower left triangle shows the MARBLES cohort. Metals are represented by their chemical symbol along the diagonal.

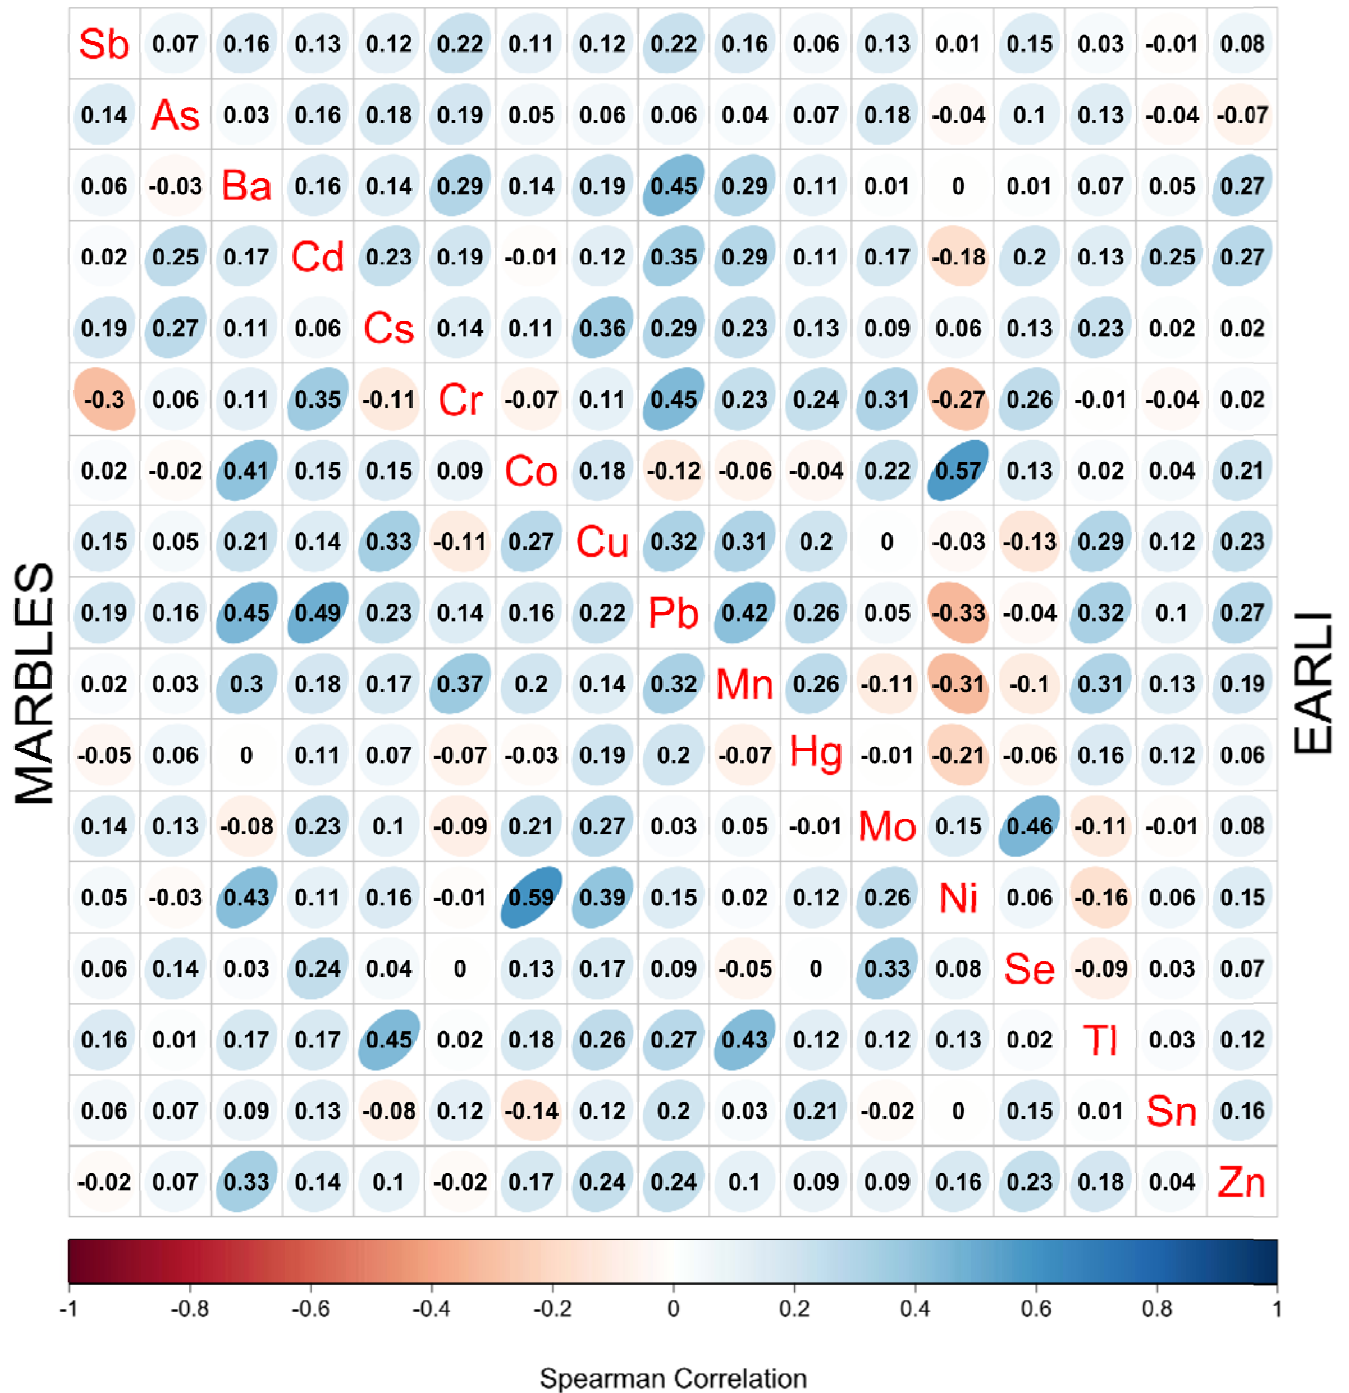

Acronyms: Early Autism Risk Longitudinal Investigation (EARLI), Markers of Autism Risk in Babies-Learning Early Signs (MARBLES),

**Figure 2.** Adjusted risk ratios for the associations between maternal urinary metals concentrations measuring during pregnancy and risk of autism spectrum disorder, relative to typically developing. Antimony, cadmium, chromium, and lead compare over limit of detection vs under the limit of detection for that metal. Remaining metals show the risk ratio for a doubling in metal concentration. Analyses were performed stratified by cohort (EARLI and MARBLES) and then meta-analyzed across cohorts. Red denotes a nominal meta-analysis p-value < 0.05, and orange a nominal meta-analysis p-value < 0.10.

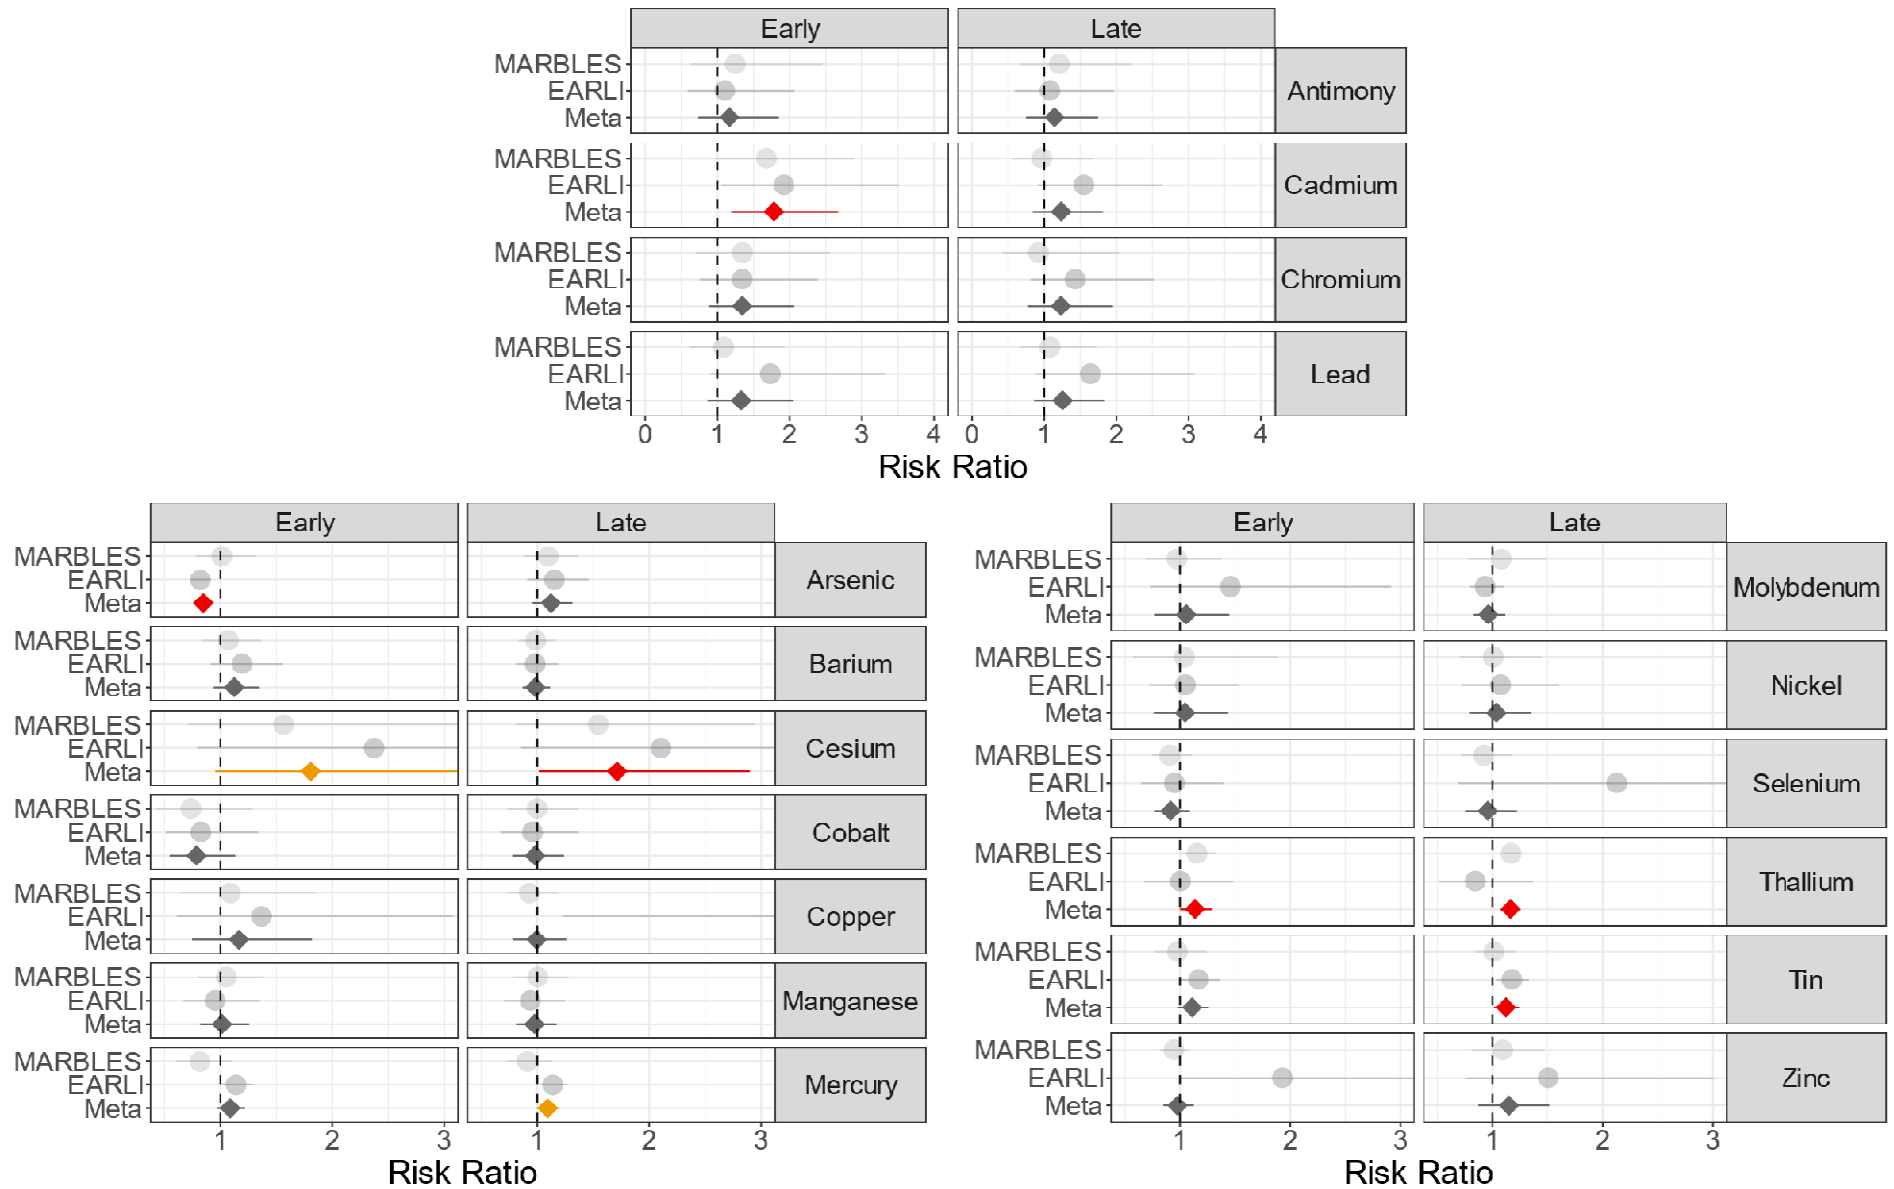

**Figure 3.** Adjusted risk ratios for the associations between maternal urinary metals concentrations measuring during pregnancy and risk of non-typically developing, relative to typically developing. Antimony, cadmium, chromium, and lead compare over limit of detection vs under the limit of detection for that metal. Remaining metals show risk ratio for a doubling in metal concentration. Analyses were performed stratified by cohort (EARLI and MARBLES) and then meta-analyzed across cohorts. Red denotes a nominal meta-analysis p-value < 0.05, and orange a nominal meta-analysis p-value < 0.10.

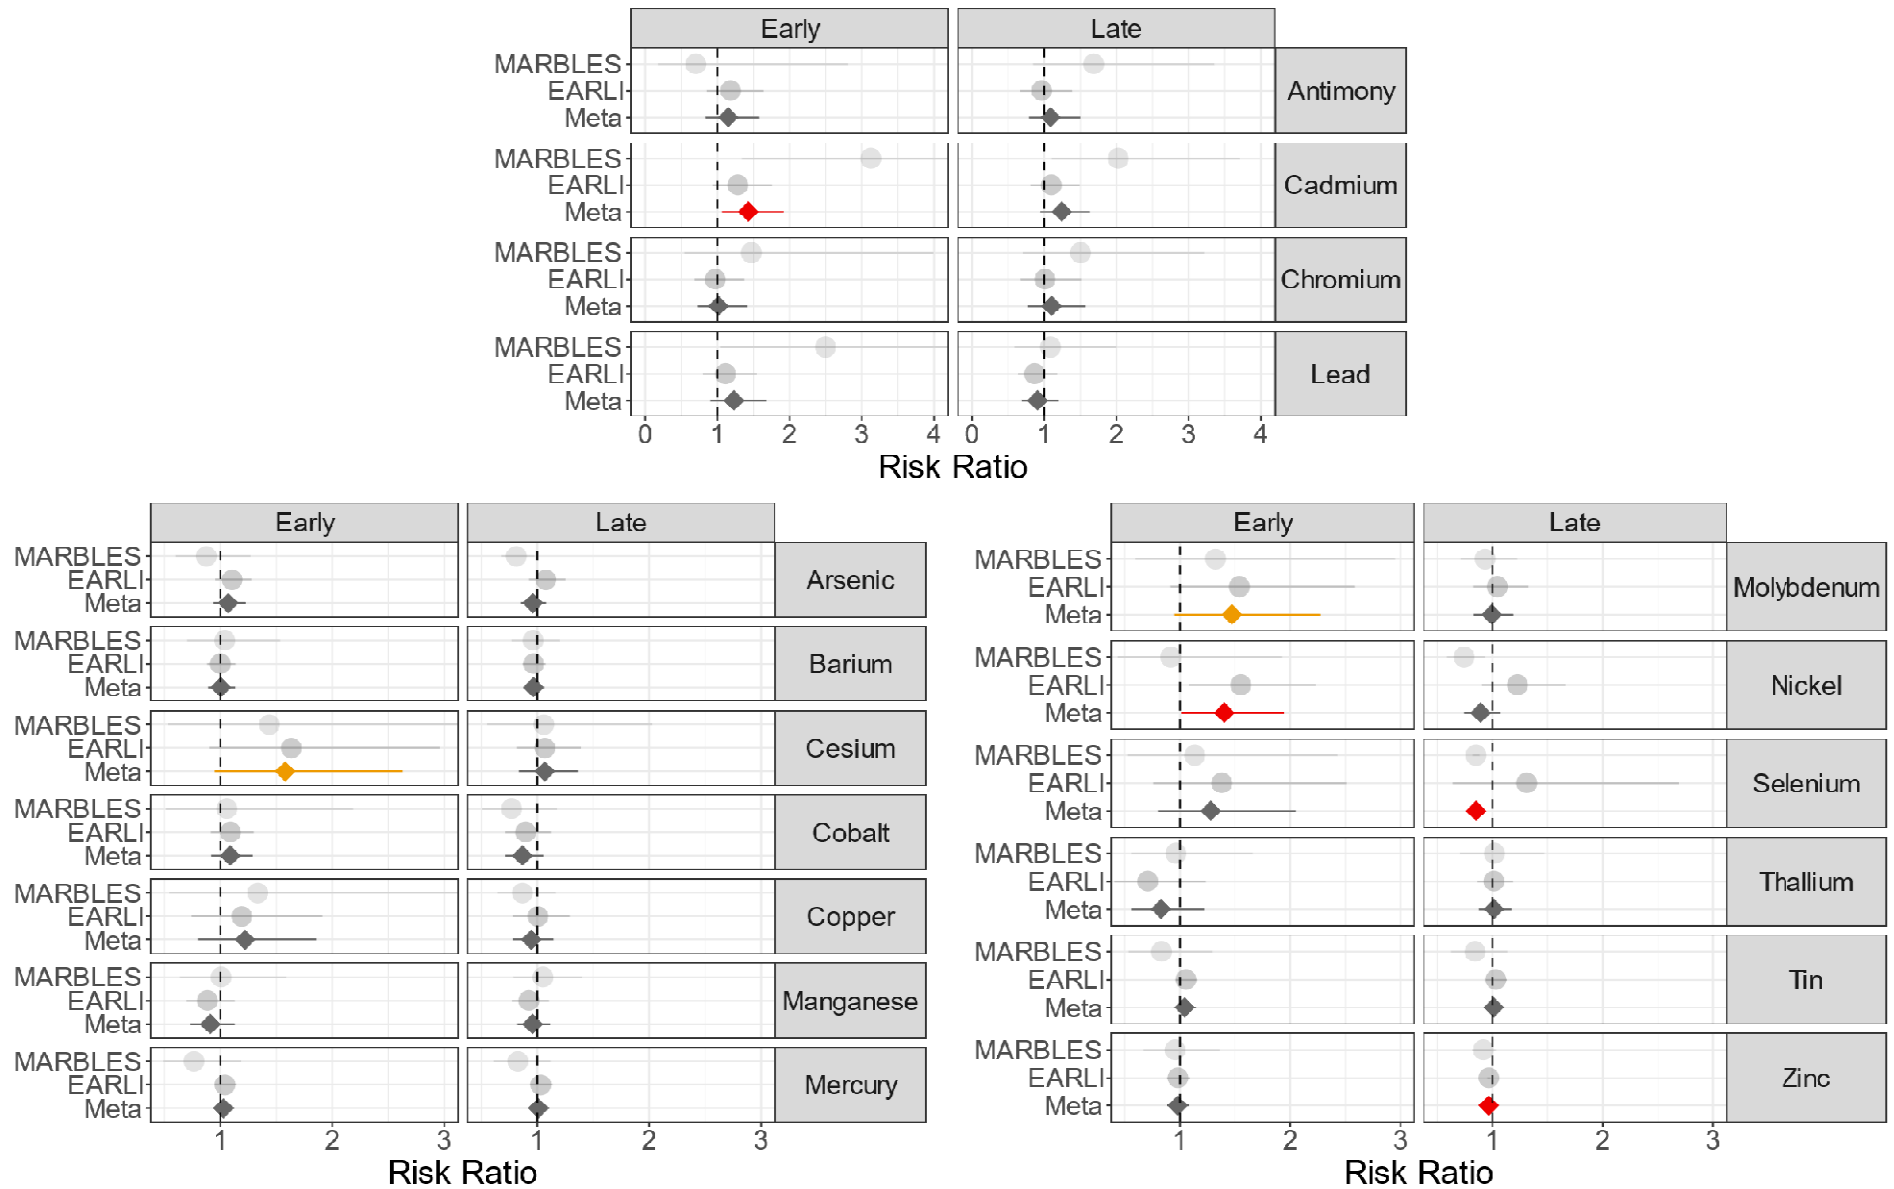

Source: https://medrxiv.org/content/10.1101/2023.11.21.23298827v1.full.pdf
